# Supplementary material
Source: PubMed Central journal article supplement (PMC7113030)
Supplement: S0899823X17002124sup001.pdf [file S0899823X17002124sup001.pdf]

# Literature Review:

## Outbreak Response and Incident Management:

### SHEA Guidance and Resources for Healthcare Epidemiologists in United States Acute Care Hospitals

---

#### Literature Review Table

| Topic                  | Subtopic                                         | Questions                                                                                                                                                                                               |
|------------------------|--------------------------------------------------|---------------------------------------------------------------------------------------------------------------------------------------------------------------------------------------------------------|
| A. Incident Management | 1. Incident Management Organizational Structures | What organizational structures are most commonly used by governmental organizations, healthcare organizations, and other responders to manage incident response? <sup>1</sup>                           |
| A. Incident Management | 1. Incident Management Organizational Structures | How should coordination of outbreak management staff and services occur? <sup>2</sup>                                                                                                                   |
| A. Incident Management | 1. Incident Management Organizational Structures | What approaches should be considered by a healthcare organization for all-hazards preparedness for infectious diseases outbreaks and how can the adequacy of these approaches be assessed? <sup>3</sup> |
| A. Incident Management | 4. Stakeholders in Preparedness and Response     | Who are the key stakeholders required in a facility outbreak response and what are their roles? <sup>4</sup>                                                                                            |
| A. Incident Management | 4. Stakeholders in Preparedness and Response     | Who are the key stakeholders required in an emerging pathogen outbreak response and what are their roles? <sup>5</sup>                                                                                  |
| A. Incident Management | 5. Communication Strategies                      | What are effective internal and external communication strategies during an outbreak and who should be responsible for their delivery? <sup>6</sup>                                                     |

<sup>1</sup> IDO+IM

<sup>2</sup> IDO+IM

<sup>3</sup> IDO + IM + ((((((hazards[All Fields] AND ("Assessment"[Journal] OR "assessment"[All Fields])) OR hazards[All Fields]) OR ("civil defense"[MeSH Terms] OR ("civil"[All Fields] AND "defense"[All Fields]) OR "civil defense"[All Fields] OR ("emergency"[All Fields] AND "preparedness"[All Fields]) OR "emergency preparedness"[All Fields])) OR ("Assessment"[Journal] OR "assessment"[All Fields])) AND hasabstract[text] AND ("1990/01/01"[PDAT] : "2016/10/31"[PDAT]) AND "humans"[MeSH Terms] AND English[lang]) NOT ("civil defense"[MeSH Terms] OR ("civil"[All Fields] AND "defense"[All Fields]) OR "civil defense"[All Fields]) AND (hasabstract[text] AND ("1990/01/01"[PDAT] : "2016/10/31"[PDAT]) AND "humans"[MeSH Terms] AND English[lang])

<sup>4</sup> IDO + HE + F

<sup>5</sup> IDO + HE + EP

ORTP Expert Guidance Literature Review Table

|                                                                                                          |                                                                     |                                                                                                                                                                                                                |
|----------------------------------------------------------------------------------------------------------|---------------------------------------------------------------------|----------------------------------------------------------------------------------------------------------------------------------------------------------------------------------------------------------------|
| A. Incident Management                                                                                   | 6. Legal, Ethical, and Regulatory Requirements                      | What are the legal, ethical, and regulatory requirements associated with outbreak investigation and incident management? <sup>7</sup>                                                                          |
| B. Roles and Responsibilities of the Hospital Epidemiologist in Facility and Emerging Pathogen Outbreaks | 1. Leadership Role of the HE in Incident Management                 | What is the leadership role of a hospital epidemiologist in response to a facility outbreak? <sup>8</sup>                                                                                                      |
| B. Roles and Responsibilities of the Hospital Epidemiologist in Facility and Emerging Pathogen Outbreaks | 1. Leadership Role of the HE in Incident Management                 | What is the leadership role of a hospital epidemiologist in response to a facility outbreak? <sup>9</sup>                                                                                                      |
| B. Roles and Responsibilities of the Hospital Epidemiologist in Facility and Emerging Pathogen Outbreaks | 2. Activities and Responsibilities of the HE in Incident Management | In order to optimize healthcare facility incident management, what activities are hospital epidemiologists (HEs) involved in during the mitigation, preparedness, response, and recovery phases? <sup>10</sup> |
| B. Roles and Responsibilities of the Hospital Epidemiologist in Facility and Emerging Pathogen Outbreaks | 2. Activities and Responsibilities of the HE in Incident Management | What are key components of a healthcare organization's emergency operations plan and how can HEs assess adequacy of these plans for infectious diseases outbreaks? <sup>11</sup>                               |
| B. Roles and Responsibilities of the                                                                     | 2. Activities and Responsibilities of the HE in                     | What can HEs do to prepare for investigation and management of a facility outbreak, including written protocols and other steps? <sup>12</sup>                                                                 |

<sup>6</sup> IDO + IM + (((("communication"[MeSH Terms] OR "communication"[All Fields]) OR media[All Fields]) OR ("public relations"[MeSH Terms] OR ("public"[All Fields] AND "relations"[All Fields]) OR "public relations"[All Fields])) OR (public[All Fields] AND information[All Fields]) AND (hasabstract[text] AND ("1990/01/01"[PDAT] : "2016/10/31"[PDAT])) AND "humans"[MeSH Terms] AND English[lang])

<sup>7</sup> IDO + IM + (legal[All Fields] OR ("morals"[MeSH Terms] OR "morals"[All Fields] OR "ethical"[All Fields])) OR regulatory[All Fields] AND (hasabstract[text] AND ("1990/01/01"[PDAT] : "2016/10/31"[PDAT])) AND "humans"[MeSH Terms] AND English[lang])

<sup>8</sup> IDO + HE + F

<sup>9</sup> IDO + HE + EP

<sup>10</sup> IDO + IM

<sup>11</sup> IDO + IM

<sup>12</sup> IDO + HE + F

ORTP Expert Guidance Literature Review Table

|                                                                                                          |                                                                     |                                                                                                                                                                                                        |
|----------------------------------------------------------------------------------------------------------|---------------------------------------------------------------------|--------------------------------------------------------------------------------------------------------------------------------------------------------------------------------------------------------|
| Hospital Epidemiologist in Facility and Emerging Pathogen Outbreaks                                      | Incident Management                                                 |                                                                                                                                                                                                        |
| B. Roles and Responsibilities of the Hospital Epidemiologist in Facility and Emerging Pathogen Outbreaks | 2. Activities and Responsibilities of the HE in Incident Management | What can HEs do to prepare for management of an emerging pathogen outbreak, including written protocols and other steps <sup>13</sup>                                                                  |
| B. Roles and Responsibilities of the Hospital Epidemiologist in Facility and Emerging Pathogen Outbreaks | 3. Role of HE in Coordination with Stakeholders                     | What is the role of the HE in coordination with internal and external partners, including local, state and regional public health authorities, during a facility outbreak? <sup>14</sup>               |
| B. Roles and Responsibilities of the Hospital Epidemiologist in Facility and Emerging Pathogen Outbreaks | 3. Role of HE in Coordination with Stakeholders                     | What is the role of the HE in coordination with internal and external partners, including local, regional, and national public health authorities, during an emerging pathogen outbreak? <sup>15</sup> |
| B. Roles and Responsibilities of the Hospital Epidemiologist in Facility and Emerging Pathogen Outbreaks | 4. Clinical and Support Activities                                  | What are the recommended clinical and support activities needed to respond to a facility outbreak? <sup>16</sup>                                                                                       |
| B. Roles and Responsibilities of the Hospital Epidemiologist in Facility and Emerging Pathogen Outbreaks | 4. Clinical and Support Activities                                  | What safety and security concerns should be addressed in the investigation and management of a facility outbreak? <sup>17</sup>                                                                        |
| B. Roles and Responsibilities of the                                                                     | 4. Clinical and Support Activities                                  | Are there pathogen-specific issues that would require different levels of clinical and support activities in a facility outbreak? <sup>18</sup>                                                        |

<sup>13</sup> IDO + HE + EP

<sup>14</sup> IDO + HE + F

<sup>15</sup> IDO + HE + EP

<sup>16</sup> IDO + HE + F

<sup>17</sup> IDO + HE + F

<sup>18</sup> IDO + HE + F

ORTP Expert Guidance Literature Review Table

|                                                                                                          |                                               |                                                                                                                                               |
|----------------------------------------------------------------------------------------------------------|-----------------------------------------------|-----------------------------------------------------------------------------------------------------------------------------------------------|
| Hospital Epidemiologist in Facility and Emerging Pathogen Outbreaks                                      |                                               |                                                                                                                                               |
| B. Roles and Responsibilities of the Hospital Epidemiologist in Facility and Emerging Pathogen Outbreaks | 4. Clinical and Support Activities            | What are the recommended clinical and support activities needed to respond to an emerging pathogen outbreak? <sup>19</sup>                    |
| B. Roles and Responsibilities of the Hospital Epidemiologist in Facility and Emerging Pathogen Outbreaks | 4. Clinical and Support Activities            | What safety and security concerns should be addressed in the management of an emerging pathogen outbreak? <sup>20</sup>                       |
| B. Roles and Responsibilities of the Hospital Epidemiologist in Facility and Emerging Pathogen Outbreaks | 4. Clinical and Support Activities            | Are there pathogen-specific issues that would require different levels of biohazard containment, handling, and decontamination? <sup>21</sup> |
| B. Roles and Responsibilities of the Hospital Epidemiologist in Facility and Emerging Pathogen Outbreaks | 5. Resources and Assets for Outbreak Response | What resources and assets (institutional and external) may be available to the HE when approaching a facility outbreak? <sup>22</sup>         |
| B. Roles and Responsibilities of the Hospital Epidemiologist in Facility and Emerging Pathogen Outbreaks | 5. Resources and Assets for Outbreak Response | What resources and assets (internal and external) may be available to the HE when approaching an emerging pathogen outbreak? <sup>23</sup>    |

<sup>19</sup> IDO + HE + EP

<sup>20</sup> IDO + HE + EP

<sup>21</sup> IDO + EP + (((hazmat[All Fields] OR ("hazardous substances"[Pharmacological Action] OR "hazardous substances"[MeSH Terms] OR ("hazardous"[All Fields] AND "substances"[All Fields]) OR "hazardous substances"[All Fields] OR "biohazard"[All Fields])) OR ("containment of biohazards"[MeSH Terms] OR ("containment"[All Fields] AND "biohazards"[All Fields]) OR "containment of biohazards"[All Fields] OR "containment"[All Fields])) OR ("decontamination"[MeSH Terms] OR "decontamination"[All Fields])) OR ("personal protective equipment"[MeSH Terms] OR ("personal"[All Fields] AND "protective"[All Fields] AND "equipment"[All Fields]) OR "personal protective equipment"[All Fields]) AND (("1990/01/01"[PDAT] : "2016/10/01"[PDAT]) AND "humans"[MeSH Terms])

<sup>22</sup> IDO + HE + F

<sup>23</sup> IDO + HE + EP

ORTP Expert Guidance Literature Review Table

|                                                                                                          |                                                                                                                  |                                                                                                                                                                                                                |
|----------------------------------------------------------------------------------------------------------|------------------------------------------------------------------------------------------------------------------|----------------------------------------------------------------------------------------------------------------------------------------------------------------------------------------------------------------|
| Pathogen Outbreaks                                                                                       |                                                                                                                  |                                                                                                                                                                                                                |
| B. Roles and Responsibilities of the Hospital Epidemiologist in Facility and Emerging Pathogen Outbreaks | 6. Role of HE in Experimental Vaccines, Therapeutics, and Clinical Research during an Emerging Pathogen Outbreak | What is the role of the HE in working with partners, including industry and the FDA, regarding experimental vaccines or therapeutics and clinical research during an emerging pathogen outbreak? <sup>24</sup> |
| B. Roles and Responsibilities of the Hospital Epidemiologist in Facility and Emerging Pathogen Outbreaks | 7. Role of Infection Prevention Staff and Direct Care HCP                                                        | What is the expectation for direct patient care providers and infection prevention staff regarding their knowledge and preparedness of outbreak procedures at their facility? <sup>25</sup>                    |
| B. Roles and Responsibilities of the Hospital Epidemiologist in Facility and Emerging Pathogen Outbreaks | 7. Role of Infection Prevention Staff and Direct Care HCP                                                        | What is the expectation for direct patient care providers and infection prevention staff regarding their knowledge and preparedness of outbreak procedures for emerging pathogens? <sup>26</sup>               |
| B. Roles and Responsibilities of the Hospital Epidemiologist in Facility and Emerging Pathogen Outbreaks | 8. Equipment and Supplies for Management of an Emerging Pathogen Outbreak                                        | What equipment and supplies are likely to be required to manage an emerging pathogen outbreak? <sup>27</sup>                                                                                                   |
| C. Special Considerations for Resource-Limited Facilities and Special Patient Populations                | 1. Resource-Limited Facilities                                                                                   | How do healthcare facility characteristics (e.g. size, resource limitation, referral vs. community-based) impact the approach to incident management for infectious diseases outbreaks? <sup>28</sup>          |
| C. Special Considerations for Resource-Limited                                                           | 1. Resource-Limited Facilities                                                                                   | Which resources should hospitals access if they are unable to enact the recommended clinical and support activities? <sup>29</sup>                                                                             |

<sup>24</sup> IDO + HE + EP + ((experimental[All Fields] OR ("vaccines"[MeSH Terms] OR "vaccines"[All Fields])) OR ("J Pathol Clin Res"[Journal] OR ("clinical"[All Fields] AND "research"[All Fields]) OR "clinical research"[All Fields] OR "Clin Res"[Journal] OR ("clinical"[All Fields] AND "research"[All Fields]) OR "clinical research"[All Fields])) OR ("research"[MeSH Terms] OR "research"[All Fields]) AND (hasabstract[text] AND ("1990/01/01"[PDAT] : "2016/10/31"[PDAT]) AND "humans"[MeSH Terms] AND English[lang])

<sup>25</sup> IDO + HE + F

<sup>26</sup> IDO + HE + EP

<sup>27</sup> IDO + HE + EP

<sup>28</sup> IDO + IM

ORTP Expert Guidance Literature Review Table

|                                                                                           |                                |                                                                                                                                                                                                                                    |
|-------------------------------------------------------------------------------------------|--------------------------------|------------------------------------------------------------------------------------------------------------------------------------------------------------------------------------------------------------------------------------|
| Facilities and Special Patient Populations                                                |                                |                                                                                                                                                                                                                                    |
| C. Special Considerations for Resource-Limited Facilities and Special Patient Populations | 1. Resource-Limited Facilities | Which resources should hospitals access if they are unable to enact the recommended clinical and support activities? <sup>30</sup>                                                                                                 |
| C. Special Considerations for Resource-Limited Facilities and Special Patient Populations | 2. Special Patient Populations | In the acute care setting, are there situations or patient populations that warrant modification of policies and procedures? <sup>31</sup>                                                                                         |
| C. Special Considerations for Resource-Limited Facilities and Special Patient Populations | 2. Special Patient Populations | If the parents are sick at an outside adult facility, how can we support their sick children, and maintain contact with their parents? <sup>32</sup>                                                                               |
| C. Special Considerations for Resource-Limited                                            | 3. Long-Term Care              | For adults with suspected/confirmed emerging pathogen infection transitioning to a LTCF, what information should be required during transfer and should there be any additional precautions taken prior to transfer? <sup>33</sup> |

<sup>29</sup> IDO + HE + F

<sup>30</sup> IDO + HE + EP

<sup>31</sup> IDO + (EP OR F) + (((("parents"[MeSH Terms] OR "parents"[All Fields]) OR ("family"[MeSH Terms] OR "family"[All Fields])) OR ("child"[MeSH Terms] OR "child"[All Fields] OR "children"[All Fields])) OR visitors[All Fields] AND (("1990/01/01"[PDAT] : "2016/10/01"[PDAT]) AND "humans"[MeSH Terms]) + (((gowns[All Fields] OR ("gloves, protective"[MeSH Terms] OR ("gloves"[All Fields] AND "protective"[All Fields]) OR "protective gloves"[All Fields] OR "gloves"[All Fields])) OR (("Contact"[Journal] OR "contact"[All Fields] OR "Contact"[Journal] OR "contact"[All Fields]) AND precautions[All Fields])) OR ("isolation and purification"[Subheading] OR ("isolation"[All Fields] AND "purification"[All Fields]) OR "isolation and purification"[All Fields] OR "isolation"[All Fields])) OR ("personal protective equipment"[MeSH Terms] OR ("personal"[All Fields] AND "protective"[All Fields] AND "equipment"[All Fields]) OR "personal protective equipment"[All Fields]) AND (("1990/01/01"[PDAT] : "2016/10/01"[PDAT]) AND "humans"[MeSH Terms]) + (("Acute Care"[Journal] OR ("acute"[All Fields] AND "care"[All Fields]) OR "acute care"[All Fields]) OR ("hospitals"[MeSH Terms] OR "hospitals"[All Fields] OR "hospital"[All Fields])) OR ("intensive care units"[MeSH Terms] OR ("intensive"[All Fields] AND "care"[All Fields] AND "units"[All Fields]) OR "intensive care units"[All Fields] OR "icu"[All Fields]) AND (("1990/01/01"[PDAT] : "2016/10/01"[PDAT]) AND "humans"[MeSH Terms]))

<sup>32</sup> IDO + (EP OR F) + HE + pediatric filter

<sup>33</sup> IDO + (EP OR F) + (((("long-term care"[MeSH Terms] OR ("long-term"[All Fields] AND "care"[All Fields]) OR "long-term care"[All Fields] OR ("long"[All Fields] AND "term"[All Fields] AND "care"[All Fields]) OR "long term care"[All Fields]) OR (post[All Fields] AND ("Acute Care"[Journal] OR ("acute"[All Fields] AND "care"[All Fields]) OR "acute care"[All Fields])))) OR ("nursing homes"[MeSH Terms] OR ("nursing"[All Fields] AND "homes"[All Fields]) OR "nursing homes"[All Fields] OR ("nursing"[All Fields] AND "home"[All Fields]) OR "nursing home"[All Fields])) OR ("rehabilitation"[Subheading] OR "rehabilitation"[All Fields] OR "rehabilitation"[MeSH Terms]) AND (("1990/01/01"[PDAT] : "2016/10/01"[PDAT]) AND "humans"[MeSH Terms]))

ORTP Expert Guidance Literature Review Table

|                                                                                           |                   |                                                                                                                                                                   |
|-------------------------------------------------------------------------------------------|-------------------|-------------------------------------------------------------------------------------------------------------------------------------------------------------------|
| Facilities and Special Patient Populations                                                |                   |                                                                                                                                                                   |
| C. Special Considerations for Resource-Limited Facilities and Special Patient Populations | 3. Long-Term Care | What adaptation of policies and procedures designed for the acute care setting should be made in long-term and post-acute care settings/facilities? <sup>34</sup> |
| Removed                                                                                   | Removed           | How can hospitals manage increased staffing needs when higher ratios are required (1:1 or 2:1)? <sup>35</sup>                                                     |

## Added Resources and Articles

1. IOM. Emerging Infections: Microbial Threats to Health in the United States. Washington, DC: National Academy Press; 1992. Available from: <https://www.nap.edu/read/2008/chapter/1>.
2. SHEA. The Society for Healthcare Epidemiology of America (SHEA) Handbook for SHEA-Sponsored Guidelines and Expert Guidance Documents 2017 [cited 2017 January]. 2:[Available from: [http://www.shea-online.org/images/docs/2017\\_Handbook.pdf](http://www.shea-online.org/images/docs/2017_Handbook.pdf).
3. StanfordHealthCare. The Hospital Incident Command System: A Guide for Hospital Personnel 2015 [cited 2017 January]. Available from: <https://www.youtube.com/watch?v=14SGKLZM5c0&feature=youtu.be>.
4. NCIRD, CDC. Updated norovirus outbreak management and disease prevention guidelines. MMWR Recomm Rep. 2011;60(RR-3):1-18. PubMed PMID: 21368741.
5. NCEZID, DHQP, CDC. Guidance for Control of Carbapenem-resistant Enterobacteriaceae (CRE). 2012 CRE Toolkit 2012.
6. SanFranciscoBayAreaAdvancedPracticeCenter, NACCHO, APC. Infectious Disease Emergency Response Toolkit (IDER) [toolkit]. 2011. Available from: [http://apc.naccho.org/Products/APC20102190/Pages/ider\\_intro.aspx](http://apc.naccho.org/Products/APC20102190/Pages/ider_intro.aspx).
7. CMS. Medicare and Medicaid Programs; Emergency Preparedness Requirements for Medicare and Medicaid Participating Providers and Suppliers 2016 [cited 2016 November]. Available from: <https://www.federalregister.gov/documents/2016/09/16/2016-21404/medicare-and-medicare-programs-emergency-preparedness-requirements-for-medicare-and-medicare> Available from: <https://www.cms.gov/Medicare/Provider-Enrollment-and-Certification/SurveyCertEmergPrep/Emergency-Prep-Rule.html>
8. CMS. Emergency Preparedness Requirements for Medicare and Medicaid Participating Providers and Suppliers Final Rule 2016 [cited 2016 November]. Available from: <https://www.cms.gov/Medicare/Provider-Enrollment-and-Certification/SurveyCertEmergPrep/Emergency-Prep-Rule.html>
9. Bearman G, Bryant K, Leekha S, Mayer J, Munoz-Price LS, Murthy R, et al. Healthcare personnel attire in non-operating-room settings. Infect Control Hosp Epidemiol. 2014;35(2):107-21. doi: 10.1086/675066. PubMed PMID: 24442071.
10. Bryant KA, Harris AD, Gould CV, Humphreys E, Lundstrom T, Murphy DM, et al. Necessary Infrastructure of Infection Prevention and Healthcare Epidemiology Programs: A Review. Infect Control Hosp Epidemiol. 2016;37(4):371-80. Epub 2016/02/01. doi: 10.1017/ice.2015.333. PubMed PMID: 26832072.

<sup>34</sup> IDO + (EP OR F) + HE + (((("long-term care"[MeSH Terms] OR ("long-term"[All Fields] AND "care"[All Fields]) OR "long-term care"[All Fields] OR ("long"[All Fields] AND "term"[All Fields] AND "care"[All Fields]) OR "long term care"[All Fields]) OR (post[All Fields] AND ("Acute Care"[Journal] OR ("acute"[All Fields] AND "care"[All Fields]) OR "acute care"[All Fields]))) OR ("nursing homes"[MeSH Terms] OR ("nursing"[All Fields] AND "homes"[All Fields]) OR "nursing homes"[All Fields] OR ("nursing"[All Fields] AND "home"[All Fields]) OR "nursing home"[All Fields])) OR ("rehabilitation"[Subheading] OR "rehabilitation"[All Fields] OR "rehabilitation"[MeSH Terms]) AND (("1990/01/01"[PDAT] : "2016/10/01"[PDAT]) AND "humans"[MeSH Terms])

<sup>35</sup> IDO + (EP OR F) + HE + pediatric filter

#### ORTP Expert Guidance Literature Review Table

11. Kaye KS, Anderson DJ, Cook E, Huang SS, Siegel JD, Zuckerman JM, et al. Guidance for infection prevention and healthcare epidemiology programs: healthcare epidemiologist skills and competencies. *Infect Control Hosp Epidemiol.* 2015;36(4):369-80. doi: 10.1017/ice.2014.79. PubMed PMID: 25998192.
12. DHQP, CDC. Investigation and Control of Vancomycin-Resistant *Staphylococcus aureus* (VRSA): 2015 Update 2015 [cited 2016 November]. Available from: [https://www.cdc.gov/hai/pdfs/vrsa-investigation-guide-05\\_12\\_2015.pdf](https://www.cdc.gov/hai/pdfs/vrsa-investigation-guide-05_12_2015.pdf).
13. ASPR, HHS. Technical Resources, Assistance Center, and Information Exchange (TRACIE) 2015 [cited 2017 January]. Available from: <https://asprtracie.hhs.gov/>.

## Appendix 1: Article and Resource Selection

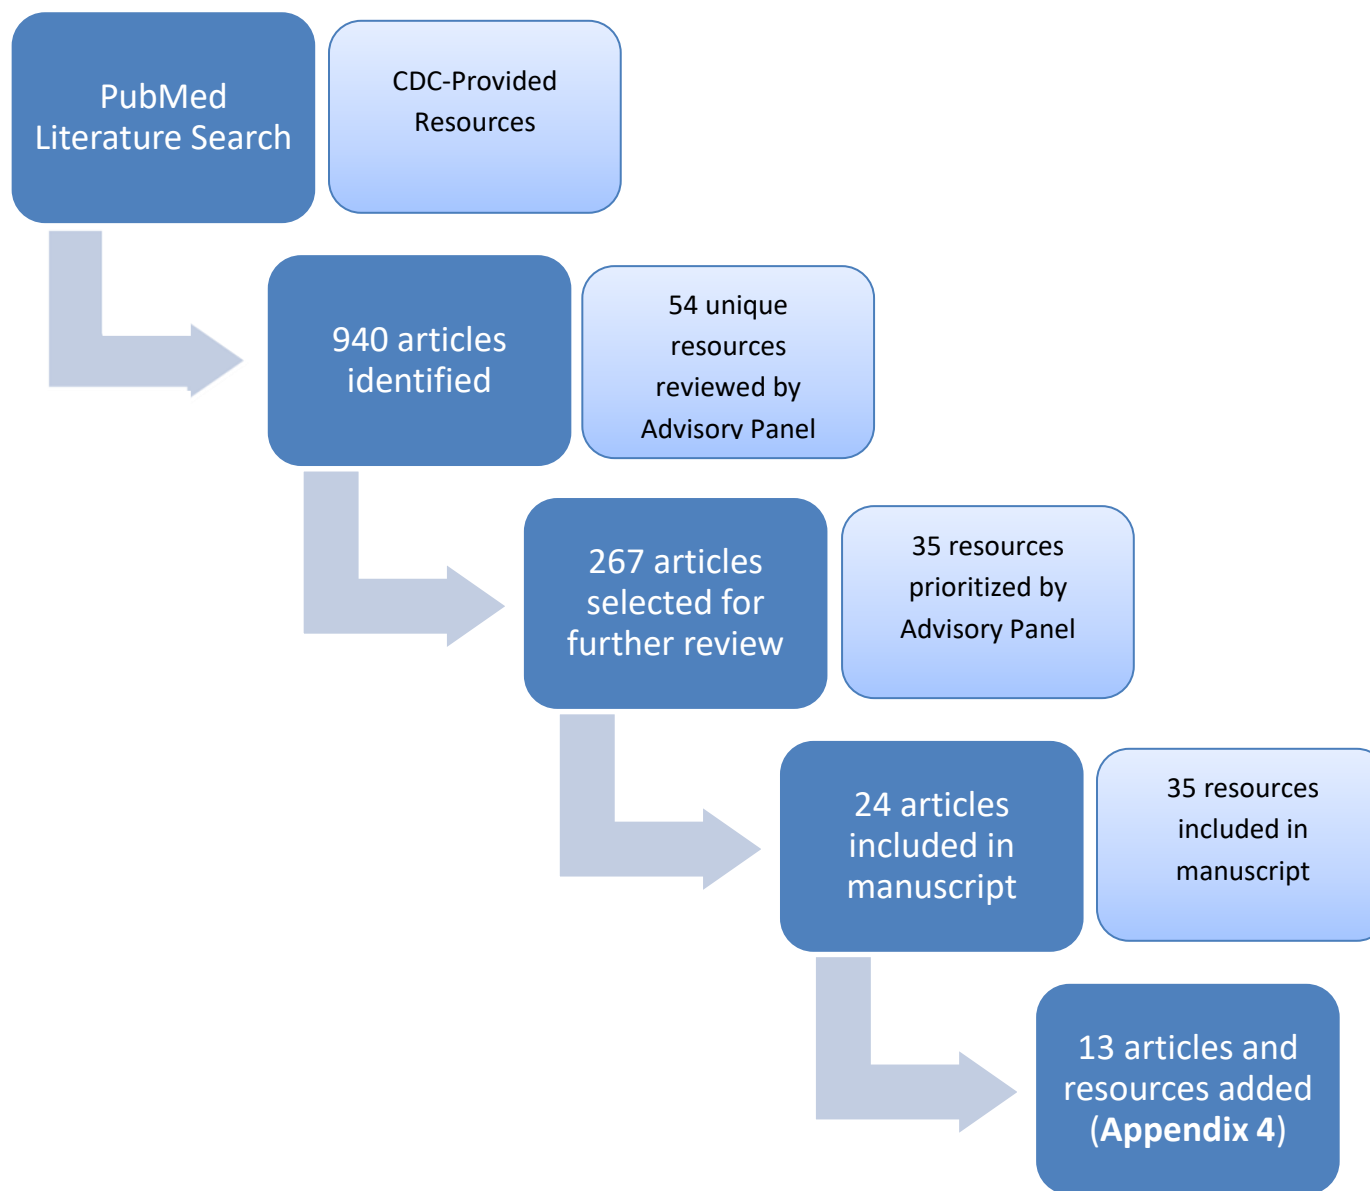

## Appendix 2: Abbreviations

1. PICO: population, intervention, comparison, outcome
2. HE: hospital epidemiologist
3. Search Terms (**Footnotes; Appendix 3**):
  - a. IDO: Infectious Diseases Outbreaks
  - b. IM: Incident Management
  - c. HE: Hospital Epidemiologist
  - d. EP: Emerging Pathogens
  - e. F: Facility Outbreaks
  - f. COP: Components of Preparedness

## Appendix 3: Literature Search Terms

### Filters

AND ( "1990/01/01"[PDat] : "2016/10/01"[PDat] ) AND Humans[Mesh] AND English[lang])) AND (hasabstract[text] AND ( "1990/01/01"[PDat] : "2016/10/01"[PDat] ) AND Humans[Mesh] AND English[lang]

- 1/1/1990-10/1/2016
- English
- Has abstract
- Humans

### *Infectious Diseases Outbreaks (IDO)*

("communicable diseases"[MeSH Terms] OR ("communicable"[All Fields] AND "diseases"[All Fields]) OR "communicable diseases"[All Fields] OR ("infectious"[All Fields] AND "diseases"[All Fields]) OR "infectious diseases"[All Fields]) AND ("disease outbreaks"[MeSH Terms] OR ("disease"[All Fields] AND "outbreaks"[All Fields]) OR "disease outbreaks"[All Fields] OR "outbreak"[All Fields]) AND (hasabstract[text] AND ("1990/01/01"[PDAT] : "2016/10/31"[PDAT]) AND "humans"[MeSH Terms] AND English[lang])

## ORTP Expert Guidance Literature Review Table

### *Incident Management (IM)*

(((((("organisation"[All Fields] OR "organization and administration"[Subheading] OR ("organization"[All Fields] AND "administration"[All Fields]) OR "organization and administration"[All Fields] OR "organization"[All Fields] OR "organizations"[MeSH Terms] OR "organizations"[All Fields]) AND ("organization and administration"[MeSH Terms] OR ("organization"[All Fields] AND "administration"[All Fields]) OR "organization and administration"[All Fields] OR "administration"[All Fields])) AND ("emergencies"[MeSH Terms] OR "emergencies"[All Fields] OR "emergency"[All Fields])) OR ("disasters"[MeSH Terms] OR "disasters"[All Fields] OR "disaster"[All Fields])) OR incident[All Fields]) AND hasabstract[text] AND ("1990/01/01"[PDAT] : "2016/10/31"[PDAT]) AND "humans"[MeSH Terms] AND English[lang])

### *Hospital Epidemiologist (HE)*

((((((("physicians"[MeSH Terms] OR "physicians"[All Fields] OR "doctor"[All Fields])) OR (("hospitals"[MeSH Terms] OR "hospitals"[All Fields] OR "hospital"[All Fields]) AND epidemiologist[All Fields])) OR ("infection control practitioners"[MeSH Terms] OR ("infection"[All Fields] AND "control"[All Fields] AND "practitioners"[All Fields]) OR "infection control practitioners"[All Fields] OR ("infection"[All Fields] AND "control"[All Fields] AND "practitioner"[All Fields]) OR "infection control practitioner"[All Fields])) OR (("infection"[MeSH Terms] OR "infection"[All Fields]) AND preventionist[All Fields])) OR (("infection control"[MeSH Terms] OR ("infection"[All Fields] AND "control"[All Fields]) OR "infection control"[All Fields]) AND committee[All Fields])) AND department[All Fields])) AND hasabstract[text] AND ("1990/01/01"[PDAT] : "2016/10/31"[PDAT]) AND "humans"[MeSH Terms] AND English[lang]) AND (hasabstract[text] AND ("1990/01/01"[PDAT] : "2016/10/31"[PDAT]) AND "humans"[MeSH Terms] AND English[lang])

### *Emerging Pathogens (EP)*

((((((((((("severe acute respiratory syndrome"[MeSH Terms] OR ("severe"[All Fields] AND "acute"[All Fields] AND "respiratory"[All Fields] AND "syndrome"[All Fields]) OR "severe acute respiratory syndrome"[All Fields] OR "mers"[All Fields]) OR SARS[All Fields]) OR (("virology"[MeSH Terms] OR "virology"[All Fields] OR "viral"[All Fields]) AND hemorrhagic[All Fields])) OR ("culicidae"[MeSH Terms] OR "culicidae"[All Fields] OR "mosquito"[All Fields])) OR ("zika virus"[MeSH Terms] OR ("zika"[All Fields] AND "virus"[All Fields]) OR "zika virus"[All Fields] OR "zika"[All Fields] OR "zika virus infection"[MeSH Terms] OR ("zika"[All Fields] AND "virus"[All Fields] AND "infection"[All Fields]) OR "zika virus infection"[All Fields])) OR (respiratory[All Fields] AND ("viruses"[MeSH Terms] OR "viruses"[All Fields] OR "virus"[All Fields])) OR ("hemorrhagic fever, ebola"[MeSH Terms] OR ("hemorrhagic"[All Fields] AND "fever"[All Fields] AND "ebola"[All Fields]) OR "ebola hemorrhagic fever"[All Fields] OR "ebola"[All Fields] OR "ebolavirus"[MeSH Terms] OR "ebolavirus"[All Fields])) OR lassa[All Fields]) OR ("pandemics"[MeSH Terms] OR "pandemics"[All Fields] OR "pandemic"[All Fields])) OR H1N1[All Fields]) OR H5N1[All Fields]) OR (resistant[All Fields] AND ("tuberculosis"[MeSH Terms] OR "tuberculosis"[All Fields])) OR ("measles"[MeSH Terms] OR "measles"[All Fields])) OR ("influenza in birds"[MeSH Terms] OR ("influenza"[All Fields] AND "birds"[All Fields]) OR "influenza in birds"[All Fields] OR ("avian"[All Fields] AND "influenza"[All Fields]) OR "avian influenza"[All Fields]) AND (hasabstract[text] AND ("1990/01/01"[PDAT] : "2016/10/01"[PDAT]) AND "humans"[MeSH Terms] AND English[lang])

### *Facility Outbreaks (F)*

((((((((((("methicillin-resistant staphylococcus aureus"[MeSH Terms] OR ("methicillin-resistant"[All Fields] AND "staphylococcus"[All Fields] AND "aureus"[All Fields]) OR "methicillin-resistant staphylococcus aureus"[All Fields] OR "mrsa"[All Fields]) OR CRE[All Fields]) OR ("acinetobacter"[MeSH Terms] OR "acinetobacter"[All Fields])) OR ("gramme negative bacteria"[All Fields] OR "gram-negative bacteria"[MeSH Terms] OR ("gram-negative"[All Fields] AND "bacteria"[All Fields]) OR "gram-negative bacteria"[All Fields] OR ("gram"[All Fields] AND "negative"[All Fields] AND "bacteria"[All Fields]) OR "gram negative

## ORTP Expert Guidance Literature Review Table

bacteria"[All Fields])) OR (catheter-associated[All Fields] AND ("urinary tract infections"[MeSH Terms] OR ("urinary"[All Fields] AND "tract"[All Fields] AND "infections"[All Fields]) OR "urinary tract infections"[All Fields] OR ("urinary"[All Fields] AND "tract"[All Fields] AND "infection"[All Fields]) OR "urinary tract infection"[All Fields])) OR ("sepsis"[MeSH Terms] OR "sepsis"[All Fields])) OR (("blood circulation"[MeSH Terms] OR ("blood"[All Fields] AND "circulation"[All Fields]) OR "blood circulation"[All Fields] OR "bloodstream"[All Fields]) AND ("infection"[MeSH Terms] OR "infection"[All Fields])) AND ("1990/01/01"[PDAT] : "2016/10/01"[PDAT]) AND "humans"[MeSH Terms] AND English[lang]) OR ("norovirus"[MeSH Terms] OR "norovirus"[All Fields])) OR ("legionella"[MeSH Terms] OR "legionella"[All Fields]) AND (hasabstract[text] AND ("1990/01/01"[PDAT] : "2016/10/01"[PDAT]) AND "humans"[MeSH Terms] AND English[lang]) + (((("bronchoscopy"[MeSH Terms] OR "bronchoscopy"[All Fields]) OR ("chimaera"[All Fields] OR "chimera"[MeSH Terms] OR "chimera"[All Fields])) OR ("endoscopes"[MeSH Terms] OR "endoscopes"[All Fields] OR "endoscope"[All Fields])) OR ("legionella"[MeSH Terms] OR "legionella"[All Fields])) OR ("meningitis"[MeSH Terms] OR "meningitis"[All Fields])) AND (((("communicable diseases"[MeSH Terms] OR ("communicable"[All Fields] AND "diseases"[All Fields]) OR "communicable diseases"[All Fields] OR ("infectious"[All Fields] AND "diseases"[All Fields]) OR "infectious diseases"[All Fields]) AND ("disease outbreaks"[MeSH Terms] OR ("disease"[All Fields] AND "outbreaks"[All Fields]) OR "disease outbreaks"[All Fields] OR "outbreak"[All Fields]) AND (hasabstract[text] AND ("1990/01/01"[PDAT] : "2016/10/31"[PDAT]) AND "humans"[MeSH Terms] AND English[lang])) AND (((((((("physicians"[MeSH Terms] OR "physicians"[All Fields] OR "doctor"[All Fields]) OR (("hospitals"[MeSH Terms] OR "hospitals"[All Fields] OR "hospital"[All Fields]) AND epidemiologist[All Fields])) OR ("infection control practitioners"[MeSH Terms] OR ("infection"[All Fields] AND "control"[All Fields] AND "practitioners"[All Fields]) OR "infection control practitioners"[All Fields] OR ("infection"[All Fields] AND "control"[All Fields] AND "practitioner"[All Fields]) OR "infection control practitioner"[All Fields])) OR ((("infection"[MeSH Terms] OR "infection"[All Fields]) AND preventionist[All Fields])) OR ((("infection control"[MeSH Terms] OR ("infection"[All Fields] AND "control"[All Fields]) OR "infection control"[All Fields]) AND committee[All Fields])) AND department[All Fields]) AND hasabstract[text] AND ("1990/01/01"[PDAT] : "2016/10/31"[PDAT]) AND "humans"[MeSH Terms] AND English[lang]) AND (hasabstract[text] AND ("1990/01/01"[PDAT] : "2016/10/31"[PDAT]) AND "humans"[MeSH Terms] AND English[lang]))

## *Components of Preparedness (COP)*

((((((((((("knowledge"[MeSH Terms] OR "knowledge"[All Fields]) OR ("education"[Subheading] OR "education"[All Fields] OR "training"[All Fields] OR "education"[MeSH Terms] OR "training"[All Fields])) OR ("education"[Subheading] OR "education"[All Fields] OR "educational status"[MeSH Terms] OR ("educational"[All Fields] AND "status"[All Fields]) OR "educational status"[All Fields] OR "education"[All Fields] OR "education"[MeSH Terms])) OR ("epidemiology"[Subheading] OR "epidemiology"[All Fields] OR "surveillance"[All Fields] OR "epidemiology"[MeSH Terms] OR "surveillance"[All Fields])) OR PPE[All Fields]) OR ("equipment and supplies"[MeSH Terms] OR ("equipment"[All Fields] AND "supplies"[All Fields]) OR "equipment and supplies"[All Fields] OR "supplies"[All Fields])) OR ("social control, formal"[MeSH Terms] OR ("social"[All Fields] AND "control"[All Fields] AND "formal"[All Fields]) OR "formal social control"[All Fields] OR "regulation"[All Fields]) AND hasabstract[text] AND ("1990/01/01"[PDAT] : "2016/10/31"[PDAT]) AND "humans"[MeSH Terms] AND English[lang]) OR ("health resources"[MeSH Terms] OR ("health"[All Fields] AND "resources"[All Fields]) OR "health resources"[All Fields] OR "resources"[All Fields]) AND (hasabstract[text] AND ("1990/01/01"[PDAT] : "2016/10/31"[PDAT]) AND "humans"[MeSH Terms] AND English[lang])) OR ("communication"[MeSH Terms] OR "communication"[All Fields])) OR staffing[All Fields] AND (hasabstract[text] AND ("1990/01/01"[PDAT] : "2016/10/31"[PDAT]) AND "humans"[MeSH Terms] AND English[lang]))

## ORTP Expert Guidance Literature Review Table

### *EP + F*

((((((((((("severe acute respiratory syndrome"[MeSH Terms] OR ("severe"[All Fields] AND "acute"[All Fields] AND "respiratory"[All Fields] AND "syndrome"[All Fields]) OR "severe acute respiratory syndrome"[All Fields] OR "mers"[All Fields]) OR SARS[All Fields]) OR ((("virology"[MeSH Terms] OR "virology"[All Fields] OR "viral"[All Fields]) AND hemorrhagic[All Fields])) OR ("culicidae"[MeSH Terms] OR "culicidae"[All Fields] OR "mosquito"[All Fields])) OR ("zika virus"[MeSH Terms] OR ("zika"[All Fields] AND "virus"[All Fields]) OR "zika virus"[All Fields] OR "zika"[All Fields] OR "zika virus infection"[MeSH Terms] OR ("zika"[All Fields] AND "virus"[All Fields] AND "infection"[All Fields]) OR "zika virus infection"[All Fields])) OR (respiratory[All Fields] AND ("viruses"[MeSH Terms] OR "viruses"[All Fields] OR "virus"[All Fields])) OR ("hemorrhagic fever, ebola"[MeSH Terms] OR ("hemorrhagic"[All Fields] AND "fever"[All Fields] AND "ebola"[All Fields]) OR "ebola hemorrhagic fever"[All Fields] OR "ebola"[All Fields] OR "ebolavirus"[MeSH Terms] OR "ebolavirus"[All Fields])) OR lassa[All Fields]) OR ("pandemics"[MeSH Terms] OR "pandemics"[All Fields] OR "pandemic"[All Fields])) OR H1N1[All Fields]) OR H5N1[All Fields]) OR (resistant[All Fields] AND ("tuberculosis"[MeSH Terms] OR "tuberculosis"[All Fields])) OR ("measles"[MeSH Terms] OR "measles"[All Fields])) OR ("influenza in birds"[MeSH Terms] OR ("influenza"[All Fields] AND "birds"[All Fields]) OR "influenza in birds"[All Fields] OR ("avian"[All Fields] AND "influenza"[All Fields]) OR "avian influenza"[All Fields]) AND (hasabstract[text] AND ("1990/01/01"[PDAT] : "2016/10/01"[PDAT]) AND "humans"[MeSH Terms] AND English[lang])) OR (((((((("methicillin-resistant staphylococcus aureus"[MeSH Terms] OR ("methicillin-resistant"[All Fields] AND "staphylococcus"[All Fields] AND "aureus"[All Fields]) OR "methicillin-resistant staphylococcus aureus"[All Fields] OR "mrsa"[All Fields]) OR CRE[All Fields]) OR ("acinetobacter"[MeSH Terms] OR "acinetobacter"[All Fields])) OR ("gramme negative bacteria"[All Fields] OR "gram-negative bacteria"[MeSH Terms] OR ("gram-negative"[All Fields] AND "bacteria"[All Fields]) OR "gram-negative bacteria"[All Fields] OR ("gram"[All Fields] AND "negative"[All Fields] AND "bacteria"[All Fields]) OR "gram negative bacteria"[All Fields])) OR (catheter-associated[All Fields] AND ("urinary tract infections"[MeSH Terms] OR ("urinary"[All Fields] AND "tract"[All Fields] AND "infections"[All Fields]) OR "urinary tract infections"[All Fields] OR ("urinary"[All Fields] AND "tract"[All Fields] AND "infection"[All Fields]) OR "urinary tract infection"[All Fields])) OR ("sepsis"[MeSH Terms] OR "sepsis"[All Fields])) OR ((("blood circulation"[MeSH Terms] OR ("blood"[All Fields] AND "circulation"[All Fields]) OR "blood circulation"[All Fields] OR "bloodstream"[All Fields]) AND ("infection"[MeSH Terms] OR "infection"[All Fields])) AND ("1990/01/01"[PDAT] : "2016/10/01"[PDAT]) AND "humans"[MeSH Terms] AND English[lang]) OR ("norovirus"[MeSH Terms] OR "norovirus"[All Fields])) OR ("legionella"[MeSH Terms] OR "legionella"[All Fields]) AND (hasabstract[text] AND ("1990/01/01"[PDAT] : "2016/10/01"[PDAT]) AND "humans"[MeSH Terms] AND English[lang])) AND ((("1990/01/01"[PDAT] : "2016/10/01"[PDAT]) AND "humans"[MeSH Terms])

### *Isolation*

((("gowns"[All Fields] OR ("gloves, protective"[MeSH Terms] OR ("gloves"[All Fields] AND "protective"[All Fields]) OR "protective gloves"[All Fields] OR "gloves"[All Fields])) OR ((("Contact"[Journal] OR "contact"[All Fields] OR "Contact"[Journal] OR "contact"[All Fields]) AND precautions[All Fields])) OR ("isolation and purification"[Subheading] OR ("isolation"[All Fields] AND "purification"[All Fields]) OR "isolation and purification"[All Fields] OR "isolation"[All Fields])) OR ("personal protective equipment"[MeSH Terms] OR ("personal"[All Fields] AND "protective"[All Fields] AND "equipment"[All Fields]) OR "personal protective equipment"[All Fields]) AND ((("1990/01/01"[PDAT] : "2016/10/01"[PDAT]) AND "humans"[MeSH Terms])

### *Family/Visitors*

((("parents"[MeSH Terms] OR "parents"[All Fields]) OR ("family"[MeSH Terms] OR "family"[All Fields])) OR ("child"[MeSH Terms] OR "child"[All Fields] OR "children"[All Fields])) OR visitors[All Fields] AND ((("1990/01/01"[PDAT] : "2016/10/01"[PDAT]) AND "humans"[MeSH Terms])

ORTP Expert Guidance Literature Review Table

*Acute Care*

((("Acute Care"[Journal] OR ("acute"[All Fields] AND "care"[All Fields]) OR "acute care"[All Fields]) OR ("hospitals"[MeSH Terms] OR "hospitals"[All Fields] OR "hospital"[All Fields])) OR ("intensive care units"[MeSH Terms] OR ("intensive"[All Fields] AND "care"[All Fields] AND "units"[All Fields]) OR "intensive care units"[All Fields] OR "icu"[All Fields]) AND ("1990/01/01"[PDAT] : "2016/10/01"[PDAT]) AND "humans"[MeSH Terms])
